# Supplementary material
Source: PubMed Central journal article supplement (PMC6353034)
Supplement: netn-02-241-s001.pdf [file netn-02-241-s001.pdf]

Supplement to Functional and structural connectome properties in the 5XFAD transgenic mouse model of Alzheimer's disease

Shelli R. Kesler, PhD, Paul Acton, MS, Vikram Rao, MS, William J. Ray, PhD

**Supplementary Figure 1.** Regions of interest for connectome analysis.

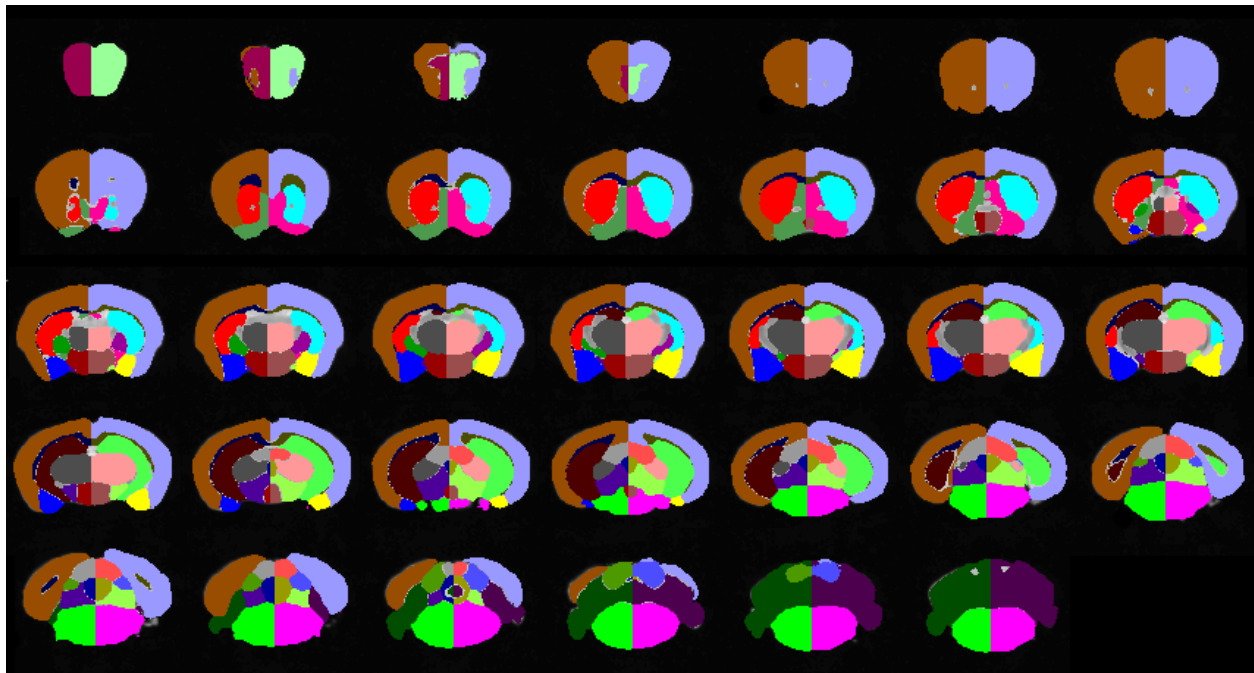

- |                                                                                     |                                                 |                                                                                      |                                 |
|-------------------------------------------------------------------------------------|-------------------------------------------------|--------------------------------------------------------------------------------------|---------------------------------|
|  | <b>Left Amygdala</b>                            |  | <b>Left Hypothalamus</b>        |
|  | <b>Right Amygdala</b>                           |  | <b>Right Hypothalamus</b>       |
|  | <b>Left Brainstem</b>                           |  | <b>Left InferiorColliculus</b>  |
|  | <b>Right Brainstem</b>                          |  | <b>Right InferiorColliculus</b> |
|  | <b>Left Caudate and Putamen</b>                 |  | <b>Left Neocortex</b>           |
|  | <b>Right Caudate and Putamen</b>                |  | <b>Right Neocortex</b>          |
|  | <b>Left CorpusCallosum and ExternalCapsule</b>  |  | <b>Left OlfactoryBulb</b>       |
|  | <b>Right CorpusCallosum and ExternalCapsule</b> |  | <b>Right OlfactoryBulb</b>      |
|  | <b>Left CentralGrayMatter</b>                   |  | <b>Left Restofmidbrain</b>      |
|  | <b>Right CentralGrayMatter</b>                  |  | <b>Right Restofmidbrain</b>     |
|  | <b>Left Cerebellum</b>                          |  | <b>Left Septum</b>              |
|  | <b>Right Cerebellum</b>                         |  | <b>Right Septum</b>             |
|  | <b>Left GlobusPallidus</b>                      |  | <b>Left SuperiorColliculi</b>   |
|  | <b>Right GlobusPallidus</b>                     |  | <b>Right SuperiorColliculi</b>  |
|  | <b>Left Hippocampus</b>                         |  | <b>Left Thalamus</b>            |
|  | <b>Right Hippocampus</b>                        |  | <b>Right Thalamus</b>           |
